# Supplementary material for: Development of a database for the analysis of the disposal system in the representative preliminary safety analysis
Source: Copernicus journal article supplement (doi:10.5194/sand-1-39-2021), 2021-11-10
Supplement: Supplementary file 1 [file sand-1-39-2021-supplement.zip]

Archive with 2 entries (2 files):
- sand-2021-15-supplement-version1.pdf
- sand-1-39-2021-supplement-title-page.pdf
