# Supplementary material for: Development of a database for the analysis of the disposal system in the representative preliminary safety analysis
Source: Copernicus journal article supplement (doi:10.5194/sand-1-39-2021), 2021-11-10
Supplement: Supplementary file 1 [file sand-1-39-2021-supplement.zip › sand-1-39-2021-supplement-title-page.pdf]

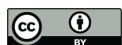

*Supplement of*

## **Development of a database for the analysis of the disposal system in the representative preliminary safety analysis**

**Eva-Maria Hoyer et al.**

*Correspondence to:* Eva-Maria Hoyer (eva-maria.hoyer@bge.de)

The copyright of individual parts of the supplement might differ from the article licence.
